# Supplementary material for: Charge-transfer metal–organic frameworks based on CuCN architecture units: crystal structures, luminescence properties and theoretical investigations
Source: Royal Society of Chemistry journal article supplement (doi:10.1039/c4ra11652f), 2014-01-01
Supplement: c4ra11652f1.pdf [file c4ra11652f1.pdf]

## **Supplementary Information for:**

# **Charge-transfer metal-organic frameworks based on CuCN architecture units: crystal structures, luminescence properties and theoretical investigations**

**Rong-Yi Huang,<sup>\*a</sup> Chen Xue,<sup>a</sup> Chang-Hai Zhu,<sup>a</sup> Zhu-Qing Wang,<sup>a</sup> Heng Xu<sup>a</sup>  
and Xiao-Ming Ren<sup>\*b</sup>**

*<sup>a</sup> Anhui Key Laboratory of Functional Coordination Compounds, School of Chemistry  
and Chemical Engineering, Anqing Normal University, Anqing 246003, P. R. China*

*<sup>b</sup> Department of Applied Chemistry, Science College, Nanjing University of  
Technology, Nanjing, 210009, P. R. China*

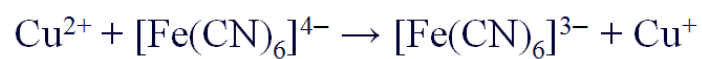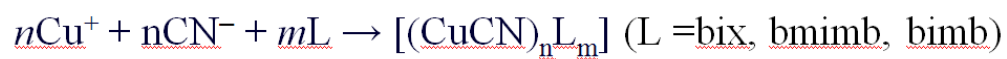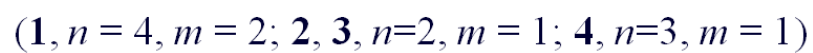

**Scheme S1.** A reasonable mechanism under the solvothermal condition

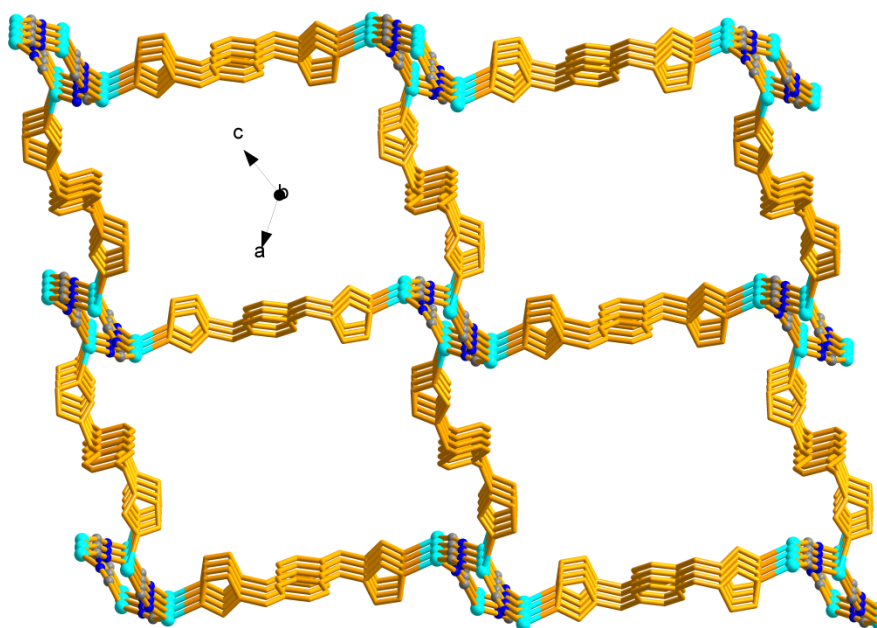

**Fig. S1** View of the 3D framework of complex **1** along the *b*-axis, H-atoms have been omitted for clarity.

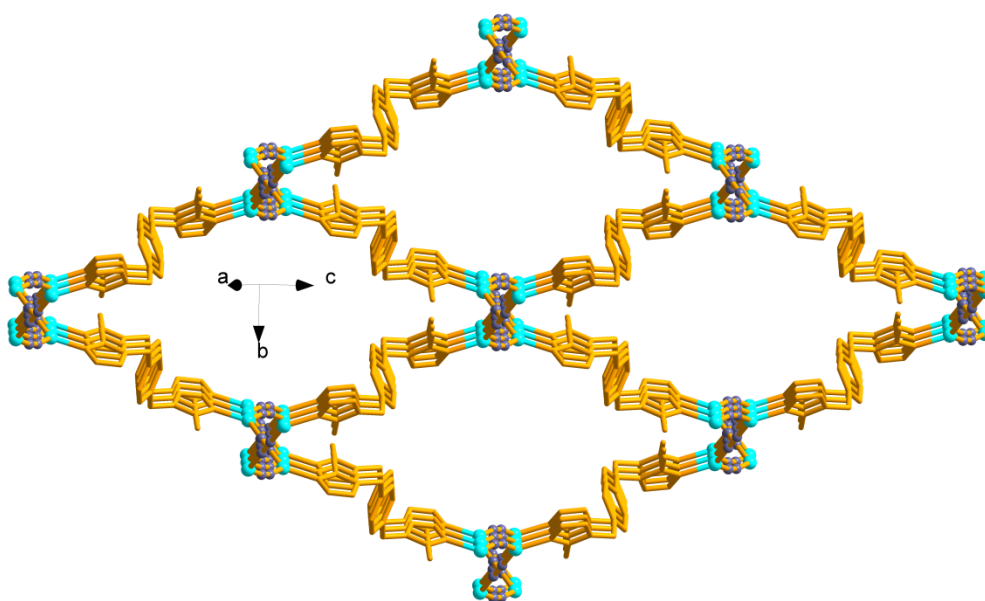

**Fig. S2** View of the 3D framework of complex **2** along the [101] direction, H-atoms have been omitted for clarity.

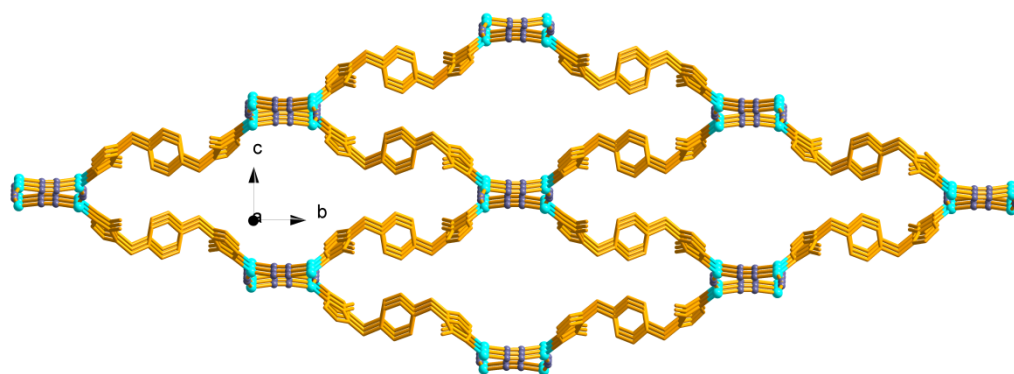

**Fig. S3** View of the 3D framework of complex **3** along the *a*-axis, H-atoms have been omitted for clarity.

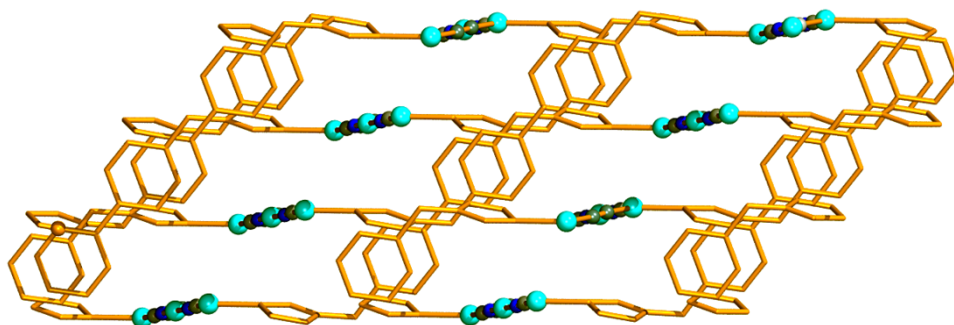

**Fig. S4** View of the 3D supramolecular framework of complex **4** along the [110] direction, H-atoms have been omitted for clarity.

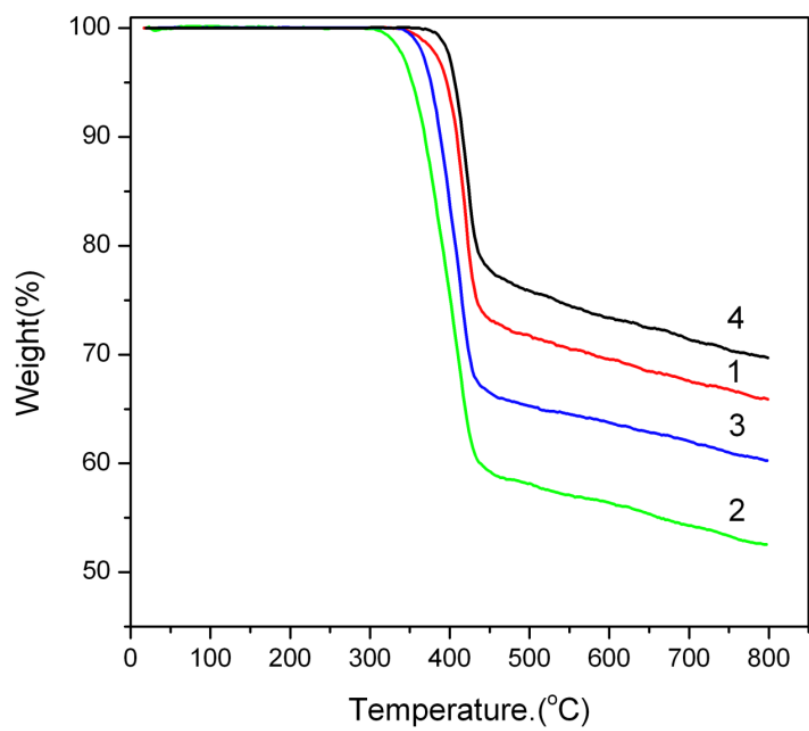

**Fig. S5** Thermogravimetry curves for 1-4

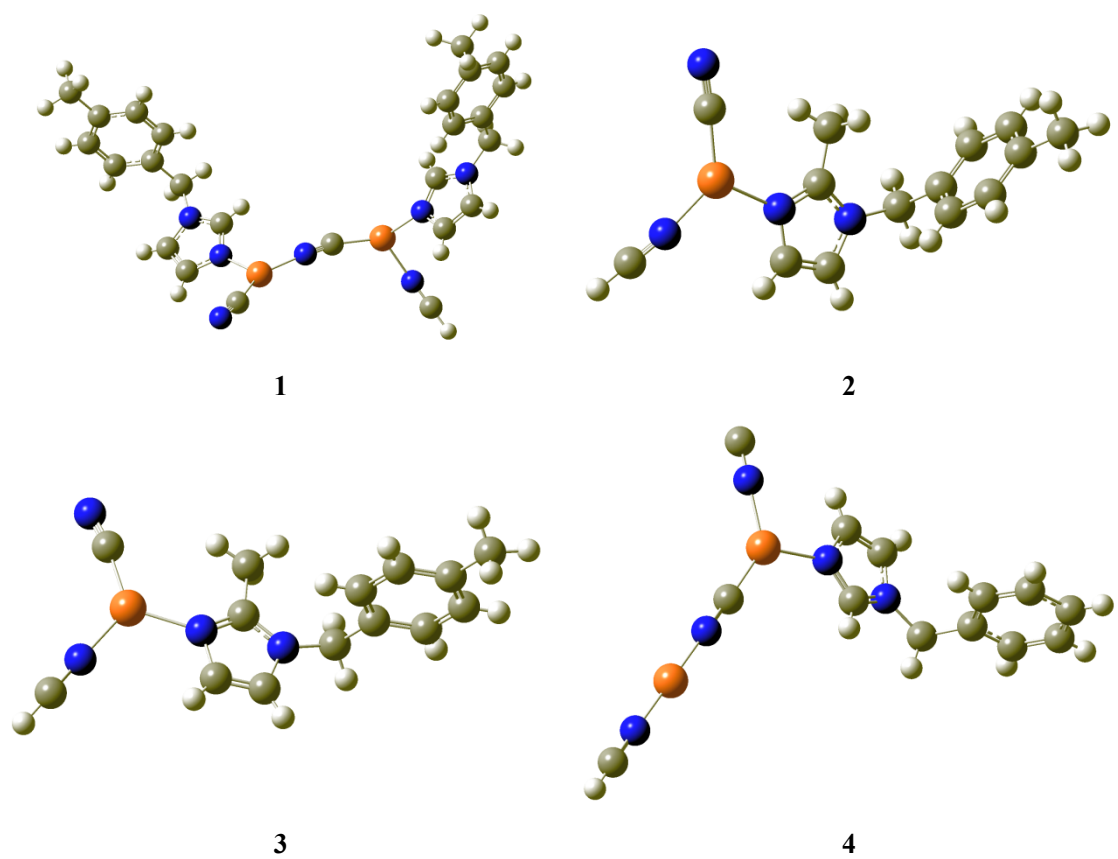

**Fig. S6** Calculation models of 1-4.



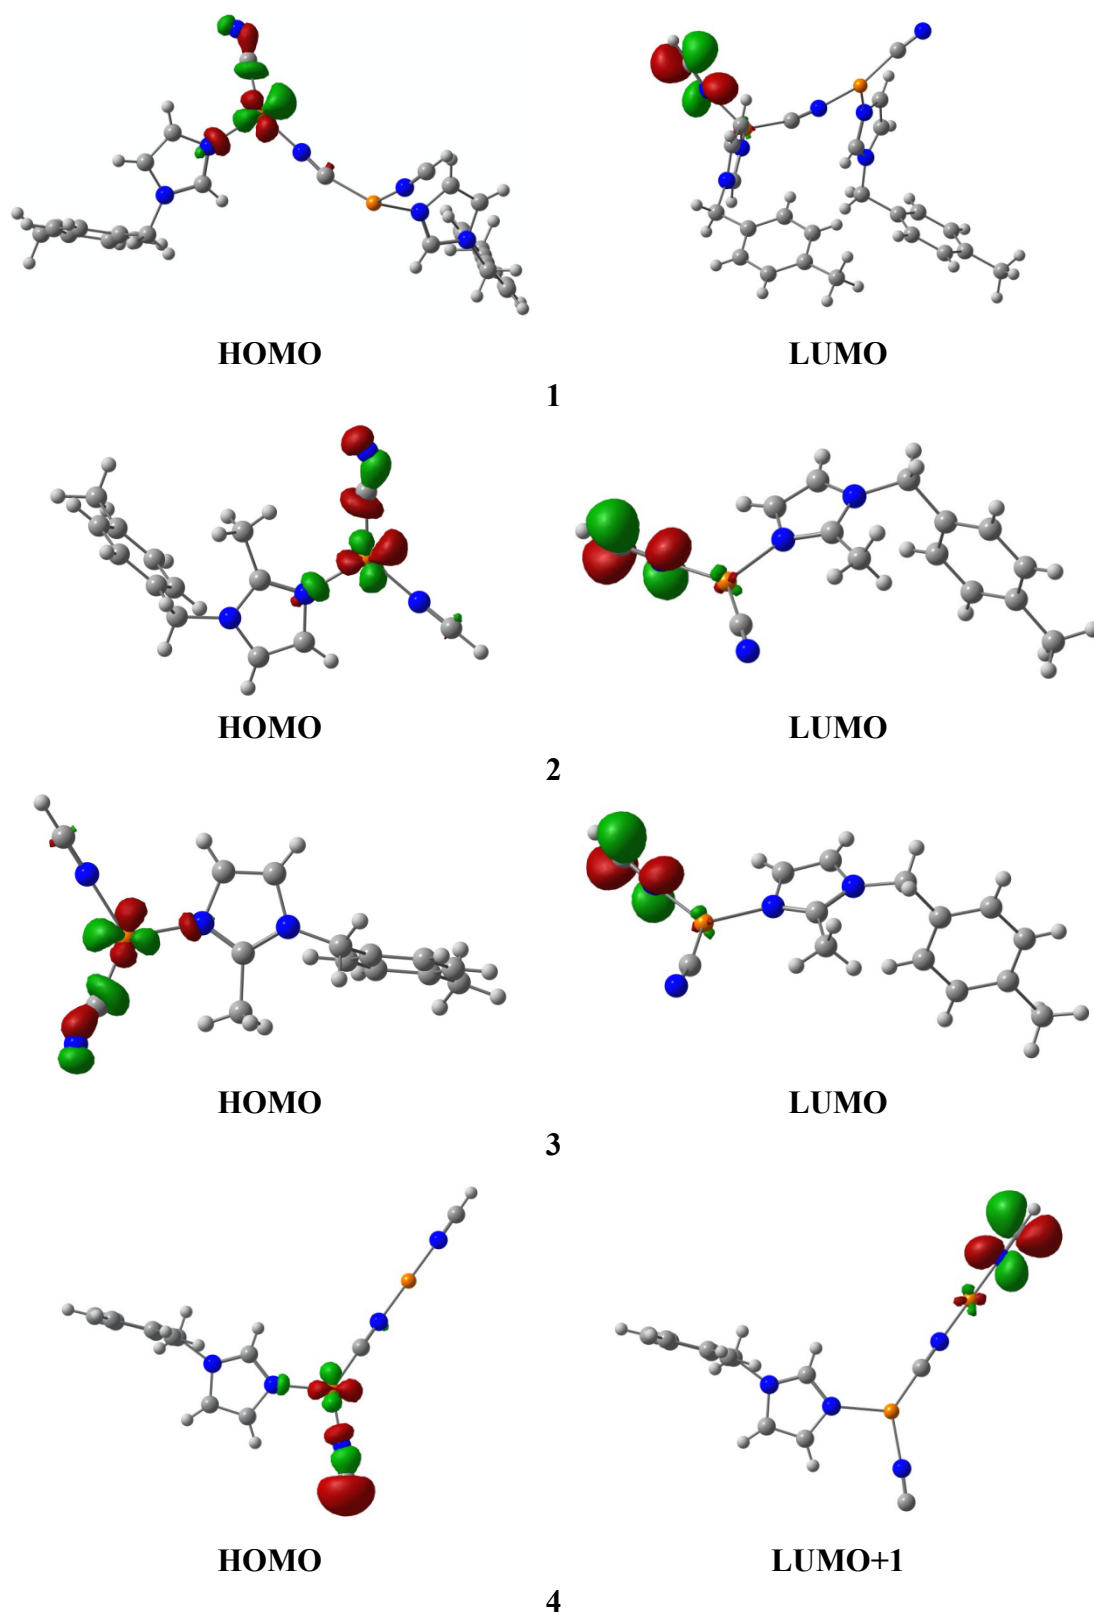

**Fig. S7** Frontier molecular orbitals of **1-4** for the ground state geometry in the gas phase.
